# Supplementary material for: A DNA-Free Editing Platform for Genetic Screens in Soybean via CRISPR/Cas9 Ribonucleoprotein Delivery
Source: Front Plant Sci. 2022 Jul 12;13:939997. doi: 10.3389/fpls.2022.939997 (PMC9315425; doi:10.3389/fpls.2022.939997)
Supplement: Supplementary file 4 [file Table_2.DOCX]

**Supplementary Table S2**. List of PCR primers used in this study

| **Target site** | **Invitro cleavage, T7E1 and Deep Target sequencing (1st PCR)** | | | | **Deep Target sequencing (2nd PCR) and Sanger sequencing** | | | |
| --- | --- | --- | --- | --- | --- | --- | --- | --- |
| **Primer Sequence (5'-3')** | **Annealing temperature**  **(Tm °C)** | **Annealing**  **Regions (bp)** | **Amplicon size**  **(bp)** | **Primer Sequence (5'-3')** | **Annealing temperature**  **(Tm °C)** | **Annealing**  **Regions (bp)** | **Amplicon size**  **(bp)** |
| T1 | **F:**CAAATACGGGAACTAGGCGG | 62 | 234-214a | 657 | **F:**CGCAAAGTTCAGAAGCCTCC | 58 | 86–105 | 148 |
| **R:**AGCGTTAAAGAAACACGTGA | 61 | 403–423 | **R:**GCCAAGAGGAAGGCCAATAG | 56 | 214–234 |
| T2 | **F:**CTTCACTGAAATTGCGACCC | 59 | 2-22a | 931 | **F:**CTTCACTGAAATTGCGACCC | 59 | -22a | 931 |
| **R:**TTGTGGCCAAAATCAGGG | 60 | 892-909 | **R:**TTGTGGCCAAAATCAGGG | 60 | 892-909 |
| T3 | **F:**CGCAAAGTTCAGAAGCCTCC | 58 | 86–105 | 660 | **F:**TTGCTTGATATTGGGCATTAC | 55 | 508–528 | 237 |
| **R:**CCAAACATGCGCTTCATCAC | 60 | 726–745 | **R:**CCAAACATGCGCTTCATCAC | 57 | 726–745 |
| T4 | **F:**GCCAGTGTAAGACAGACATCAA | 56 | 1103-1124 | 953 | **F:**GCCAGTGTAAGACAGACATCAA | 56 | 1103-1124 | 953 |
| **R:**GCTTTAGTAATCCGCTCGTAGG | 56 | 2034-2055 | **R:**GCTTTAGTAATCCGCTCGTAGG | 56 | 2034-2055 |
| T5 | **F:**TCTCCTGAAGAGAGCAGGGAb | 57 | 1601–1620 | 693 | **F:**ACGAGGCATGGTGAACTCAA | 57 | 1937–1956 | 148 |
| **R1:**AACTGCCAATTGAGCAAAGGb | 56 | 2275–2294 | **R2:**TGCCTGGGTTGATGGTGTAC | 58 | 2067–2085 |
| **F:**TCTCCTGAAGAGAGCAGGGAc | 57 | 1601–1620 | 486 | **-** |  | - | - |
| **R2:**TGCCTGGGTTGATGGTGTACc | 58 | 2067–2085 | **-** |  | - | - |

a Numbers indicates the location of designed primers at the 5′ flanking promoter regions of *GmCPR5 locus* (Glyma06g15080).

b Primers used for T7E1 assay, and deep target 1st PCR for the T5 target site.

C Primers used for invitro cleavage assay for the T5 target site.
